# Supplementary material
Source: publisher figshare collection journal article supplement (https://acs.figshare.com/ndownloader/files/9629500)

---

## Supporting Information

Manuscript Title: Alternative SiO<sub>2</sub> surface energies direct MDCK epithelial behavior

*Authors: Alan D. Covell<sup>1</sup>, Zheng Zeng<sup>1</sup>, Jianjun Wei<sup>1</sup>, Amy Adamson<sup>2</sup>, Dennis R. LaJeunesse<sup>1\*</sup>*

<sup>1</sup>Department of Nanoscience, Joint School of Nanoscience and Nanoengineering, University of North Carolina at Greensboro, Greensboro, NC 27401, USA.

<sup>2</sup>Department of Biology, University of North Carolina at Greensboro, Greensboro, NC 27402, USA.

\* Corresponding Author: [drlajeun@uncg.edu](mailto:drlajeun@uncg.edu)

Supplemental Figure: 5

Supplemental Tables: 0

Figure S1-Sn. Raman spectrum of <111> substrate (three trials).

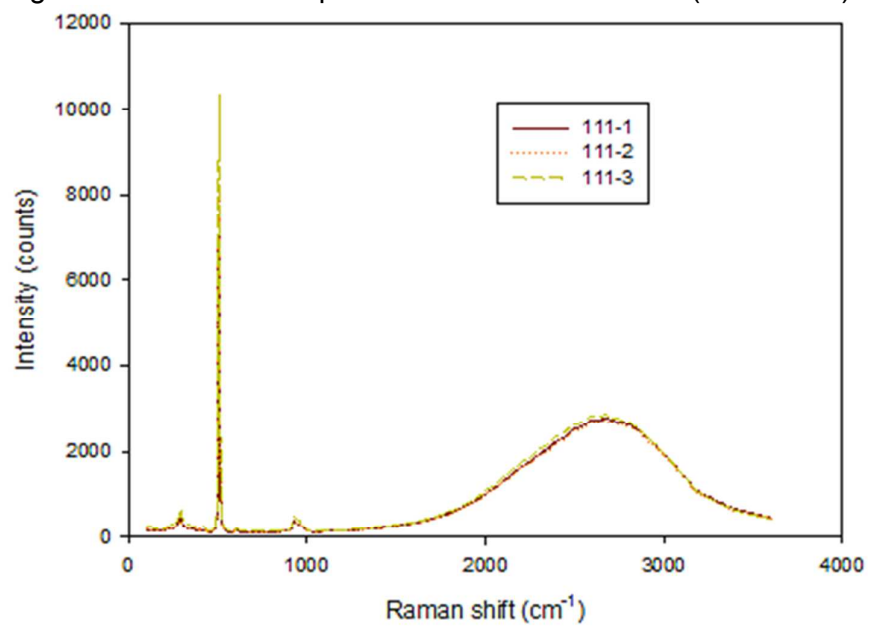

Figure S2-Sn. Raman spectrum of <100> substrate (three trials).

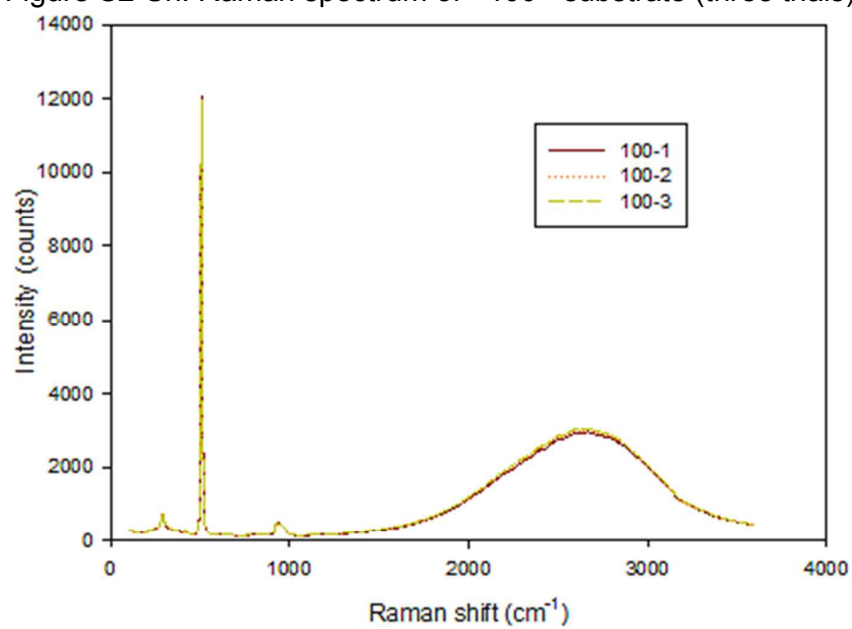

Figure S3-Sn: EDX analysis of <111> and <100> Si wafers

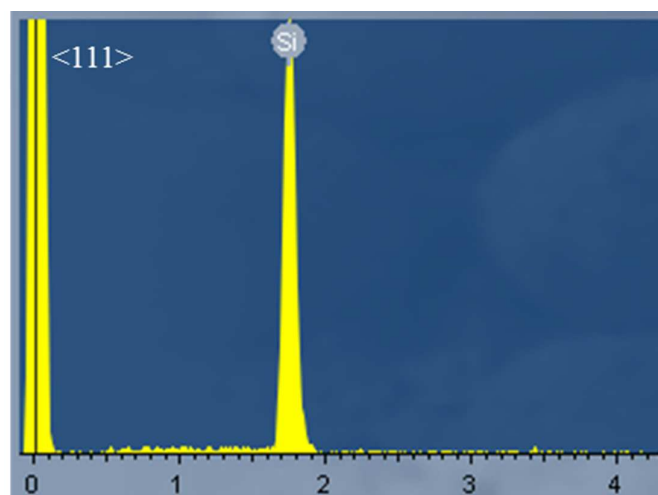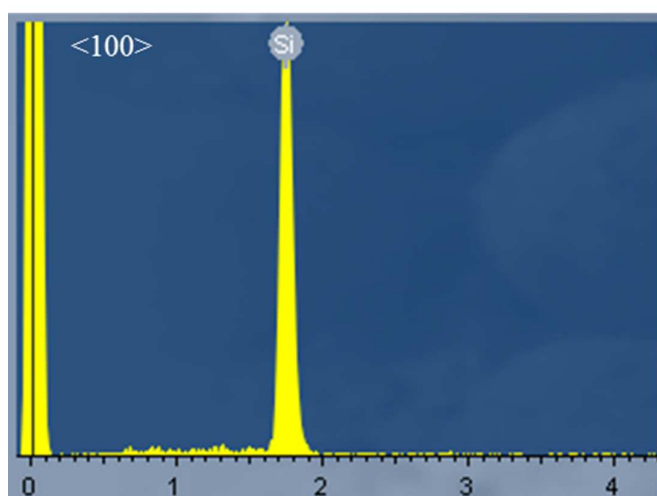

Figure S4-Sn. Epithelial Cell Growth on SiO<sub>2</sub> substrated, 1 and 4 day culture compared on 100-SiW, 111-SiW, and GCS both with standard RCA-1 cleaning, and plasma cleaning. Values are given as Percent Differences to GCS. The 100-SiW Growth was the only consistent statistically significant difference observed (n=5, p<0.05).

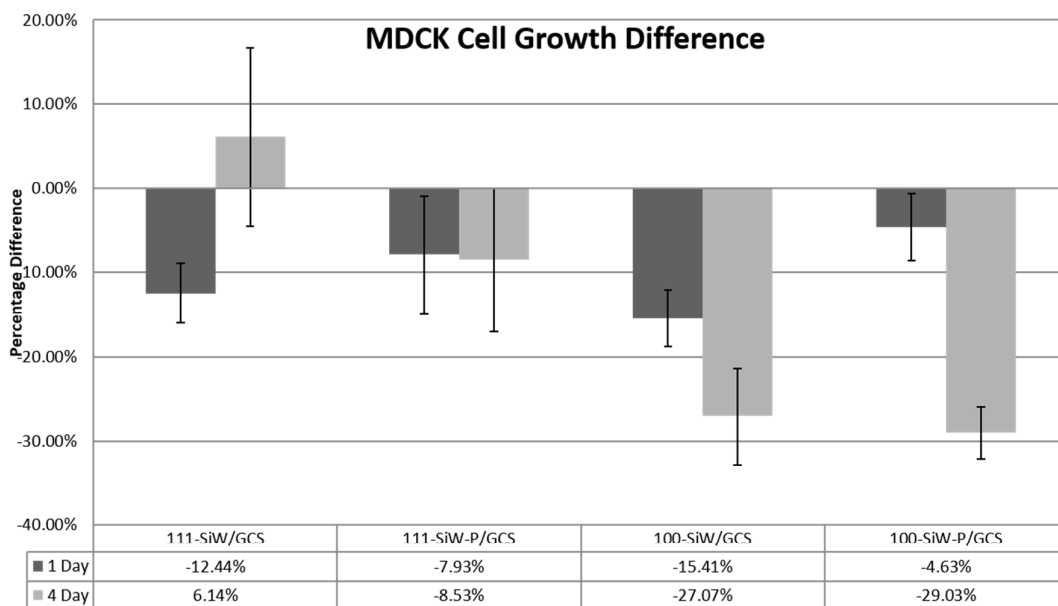

Figure S5-Sn: Confocal micrographs of the basal portion of MDCK epithelial cells demonstrating the expression of laminin (A-C) and collagen (D-F) in cells cultured on glass coverslip (A,D), <111> derived SiO<sub>2</sub> substrates (B,E), and <100> derived SiO<sub>2</sub> substrates (C, F). Note the upregulated of both ECM proteins in the cells cultured on <100> substrates when compared to cells cultured on other SiO<sub>2</sub> substrates.

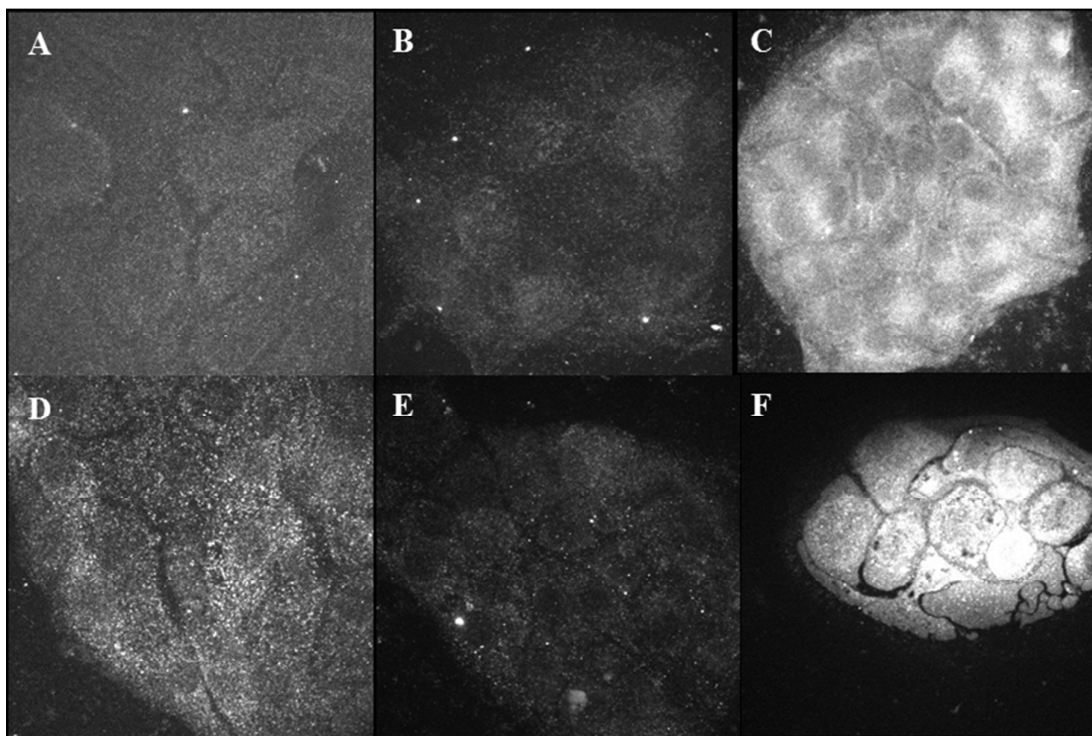

Supplement: Supplementary file 1 [file 9629500]
